# Supplementary material for: Light-Induced Activation of a Specific Type-5 Metabotropic Glutamate Receptor Antagonist in the Ventrobasal Thalamus Causes Analgesia in a Mouse Model of Breakthrough Cancer Pain
Source: MDPI journal article supplement (doi:10.3390/ijms23148018), 2022-07-20
Supplement: s1 [file s1]

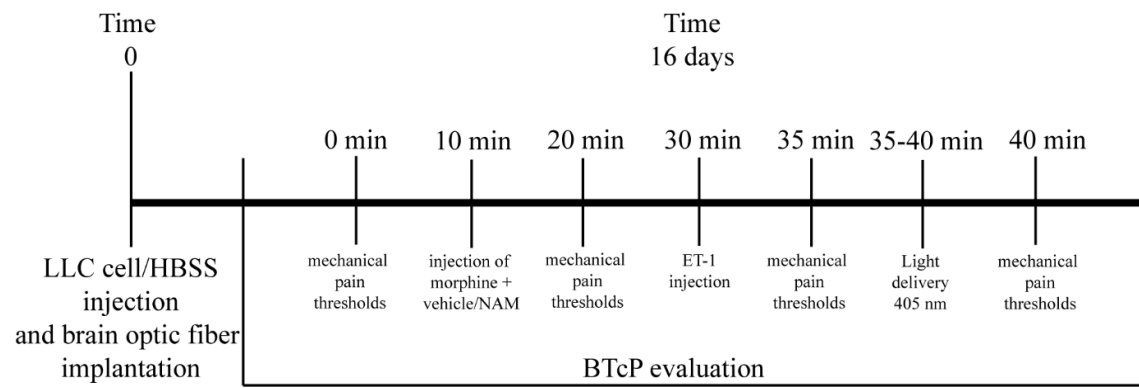

**Figure S1** Time line of the experiment.

LLC (Lewis Lung Carcinoma cells); HBSS (D-Hank's balanced salt solution); BTcP (breakthrough cancer pain);
